# Supplementary material for: Complete mitochondrial genomes of living and extinct pigeons revise the timing of the columbiform radiation
Source: PubMed Central journal article supplement (PMC5080718; doi:10.1186/s12862-016-0800-3), 2016-10-26

A

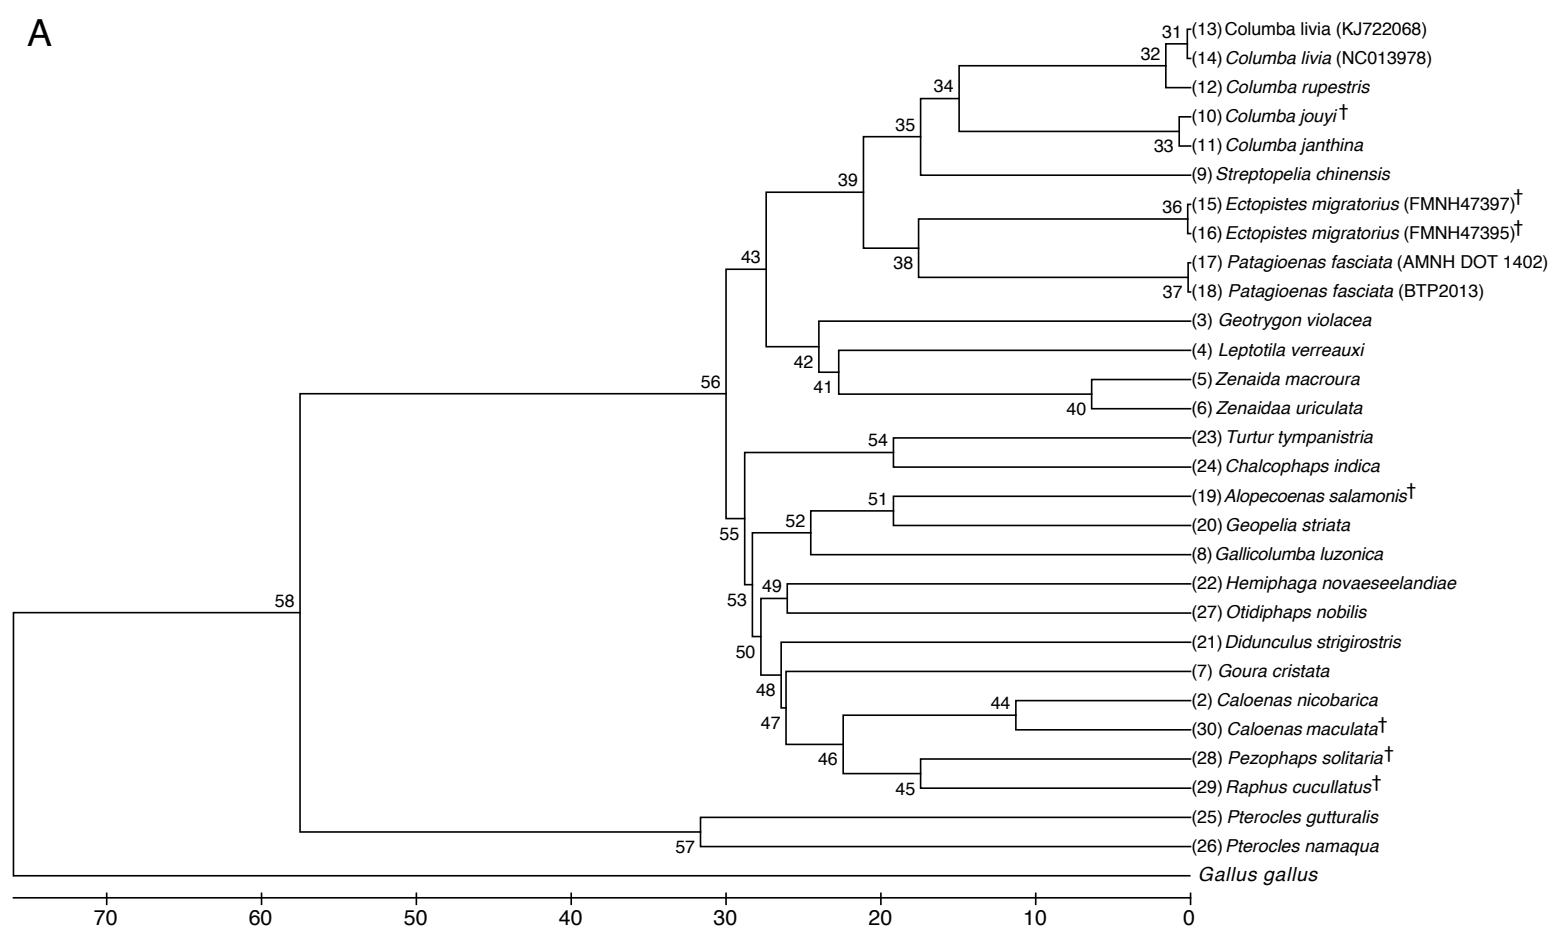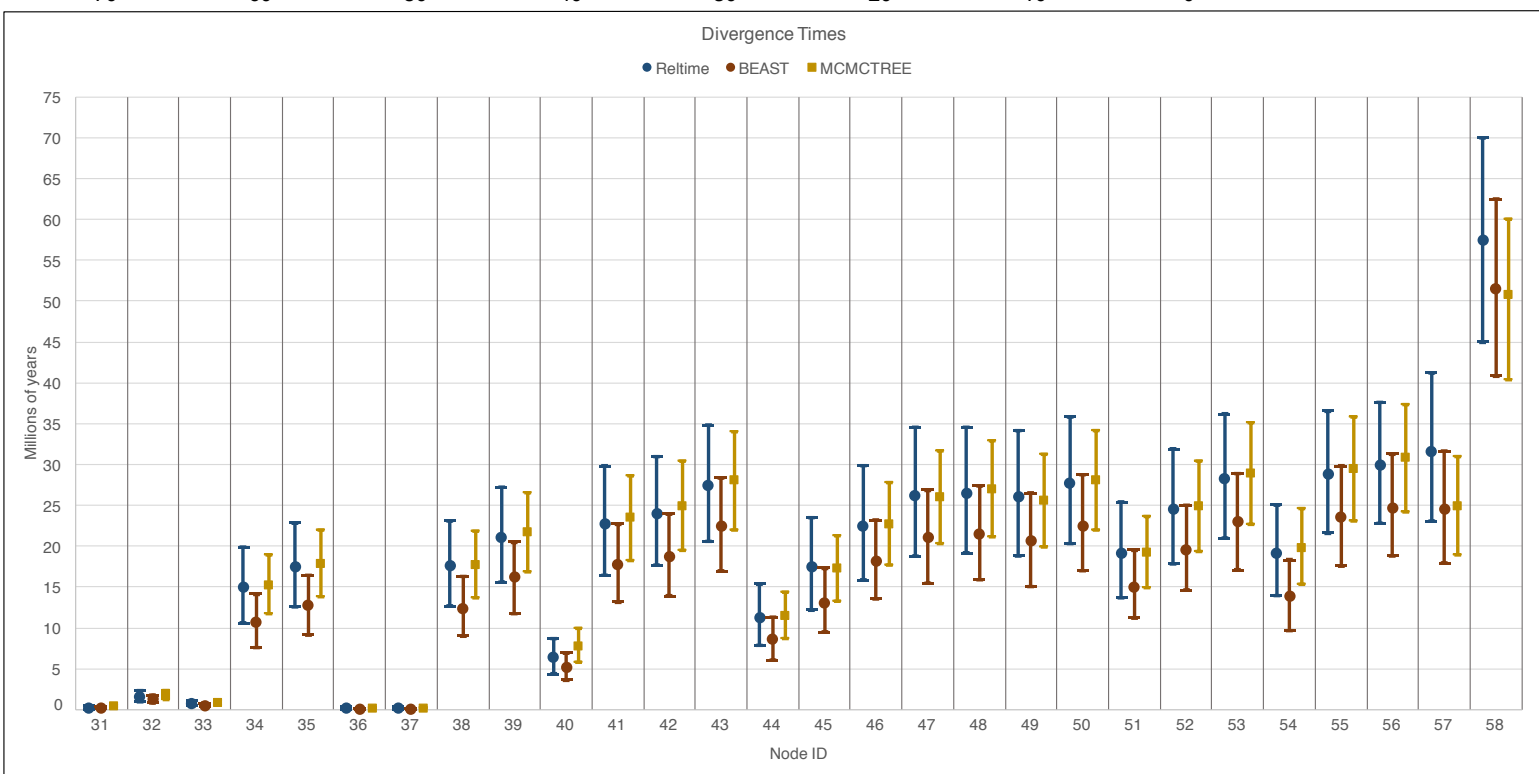

Supplement: 12862_2016_800_MOESM3_ESM.pdf [file 12862_2016_800_MOESM3_ESM.pdf]
